# Supplementary material for: What is behind a gas stream scrubbing liquid? Monoethanolamine/water mixtures as seen by dielectric relaxation spectroscopy
Source: Royal Society of Chemistry journal article supplement (doi:10.1039/d3cp05027k), 2024-01-01
Supplement: d3cp05027k1.pdf [file d3cp05027k1.pdf]

Supporting information for  
“What is behind a gas stream scrubbing liquid?  
Monoethanolamine/water mixtures as seen by  
dielectric relaxation spectroscopy”

Vira Ageienko<sup>1,2\*</sup> and Richard Buchner<sup>3</sup>

---

<sup>1</sup>Laboratory of Engineering Chemistry, Research Institute for Chemistry, Lobachevsky State University of Nizhny Novgorod, 23 Gagarina av., 603022 Nizhny Novgorod, Russian Federation; E-mail: vera.n.ageenko@gmail.com

<sup>2</sup>Nanotechnology and Biotechnology Department, Nizhny Novgorod State Technical University n.a. R.E. Alekseev, 24 Minina str., 603950 Nizhny Novgorod, Russian Federation.

<sup>3</sup>Institut für Physikalische und Theoretische Chemie, Universität Regensburg, Universitätsstraße 31, D-93040 Regensburg, Germany.

Table S1: Molality ( $m_1$ ) of MEA (1) in water (2), associated molar concentrations ( $c_1$ ,  $c_2$ ), molar ( $x_1$ ) and mass ( $w_1$ ) fractions of the studied MEA/water mixtures, together with their density ( $\rho$ ), viscosity ( $\eta$ ), and the degree of MEA protonation ( $\alpha_{\text{MEA}\cdot\text{H}^+}$ ) at 298.15 K.

| $m_1$<br>(mol·kg <sup>-1</sup> ) | $\rho$ (g·cm <sup>-3</sup> ) | $\eta$ (mPa·s) | $c_1$ (M) | $c_2$ (M) | $x_1 \times 100$ | $w_1 \times 100$ | $\alpha_{\text{MEA}\cdot\text{H}^+}^a$<br>$\times 100$ |
|----------------------------------|------------------------------|----------------|-----------|-----------|------------------|------------------|--------------------------------------------------------|
| 0.000                            | 0.99703                      | 0.890          | 0.000     | 55.34     | 0.000            | 0.000            |                                                        |
| 0.101                            | 0.99721                      | 0.939          | 0.100     | 55.02     | 0.1815           | 0.6126           | 1.762                                                  |
| 0.254                            | 0.99747                      | 0.979          | 0.250     | 54.52     | 0.4562           | 1.530            | 1.119                                                  |
| 0.517                            | 0.99808                      | 1.01           | 0.500     | 53.71     | 0.922            | 3.060            | 0.792                                                  |
| 1.066                            | 0.99916                      | 1.06           | 1.000     | 52.07     | 1.885            | 6.114            | 0.561                                                  |
| 2.275                            | 1.00160                      | 1.35           | 2.000     | 48.82     | 3.936            | 12.20            | 0.397                                                  |
| 4.419                            | 1.00582                      | 1.77           | 3.500     | 43.97     | 7.374            | 21.25            | 0.300                                                  |
| 7.087                            | 1.01042                      | 2.51           | 4.998     | 39.14     | 11.32            | 30.21            | 0.251                                                  |
| 11.89                            | 1.01676                      | 4.00           | 6.996     | 32.72     | 17.61            | 42.03            | 0.212                                                  |
| 19.04                            | 1.02216                      | 6.47           | 8.997     | 26.23     | 25.54            | 53.77            | 0.187                                                  |
| 31.12                            | 1.02547                      | 10.5           | 11.00     | 19.62     | 35.92            | 65.53            | 0.169                                                  |
| 67.52                            | 1.02418                      | 16.8           | 13.47     | 11.09     | 54.88            | 80.48            | 0.153                                                  |
| 144.37                           | 1.01960                      | 19.2           | 14.99     | 5.765     | 72.23            | 89.81            | 0.145                                                  |
|                                  | 1.01142                      | 18.6           | 16.56     | 0.000     | 100.0            | 100.0            |                                                        |

<sup>a</sup> Estimated from  $pK_a = 9.5$  [1].

Table S2: Static permittivities ( $\epsilon_s$ ), permittivities at infinite frequency ( $\epsilon_\infty$ ), amplitudes ( $S_j$ ;  $j = 1 \dots 4$ ), relaxation times ( $\tau_j$ ) and values of the reduced error function ( $\sigma$ ) of the investigated MEA/water mixtures at 298.15 K. See Main Manuscript for the selected relaxation models; data for neat water were taken from Ref. [2].<sup>a</sup>

| $c$ (M) | $S_1$ | $S_2$ | $S_3$ | $S_4$ | $\tau_1$<br>(ps) | $\tau_2$<br>(ps)   | $\tau_3$<br>(ps)  | $\tau_4$<br>(ps) | $\epsilon_s$ | $\epsilon_\infty$ | $10^2\sigma$ |
|---------|-------|-------|-------|-------|------------------|--------------------|-------------------|------------------|--------------|-------------------|--------------|
| 0.000   |       |       | 72.42 | 2.43  |                  |                    | 8.35              | 0.28             | 78.37        | 3.52              |              |
| 0.100   |       |       | 71.99 | 2.32  |                  |                    | 8.46              | 0.36             | 77.83        | 3.52 <sup>b</sup> | 0.66         |
| 0.250   |       |       | 71.79 | 2.22  |                  |                    | 8.67 <sup>c</sup> | 0.50             | 77.53        | 3.52 <sup>b</sup> | 1.63         |
| 0.500   | 0.39  |       | 70.07 | 2.95  |                  | 120 <sup>b,d</sup> | 9.09              | 0.79             | 76.92        | 3.52 <sup>b</sup> | 1.51         |
| 1.000   | 0.32  | 6.40  | 63.30 | 2.36  | 111              | 16 <sup>b</sup>    | 9.39              | 0.33             | 75.91        | 3.52 <sup>b</sup> | 1.92         |
| 2.000   | 1.71  | 12.12 | 53.11 | 2.07  | 66.9             | 16.4               | 10.7              | 1.49             | 73.63        | 4.62              | 1.58         |
| 3.500   | 1.99  | 21.43 | 40.59 | 1.82  | 104              | 22.9               | 12.3              | 0.92             | 70.23        | 4.41              | 1.40         |
| 4.998   | 3.10  | 27.95 | 29.38 | 1.39  | 111              | 29.3               | 14.1              | 1.62             | 66.71        | 4.89              | 0.52         |
| 6.996   | 4.13  | 34.79 | 16.38 | 1.62  | 156              | 41.5               | 16.0              | 3.84             | 62.01        | 5.09              | 0.61         |
| 8.997   | 7.41  | 35.50 | 7.62  | 2.00  | 190              | 54.7               | 19.6              | 2.80             | 56.86        | 4.34              | 0.20         |
| 11.00   | 9.07  | 30.44 | 5.68  | 1.68  | 276              | 78.9               | 24.8              | 2.43             | 50.88        | 4.02              | 0.68         |
| 13.50   | 10.23 | 21.77 | 5.28  | 1.37  | 399              | 113                | 33.9              | 3.53             | 42.61        | 3.95              | 0.18         |
| 14.99   | 11.02 | 16.34 | 4.65  | 1.37  | 439              | 115                | 33.3              | 3.28             | 37.07        | 3.68              | 0.18         |
| 16.56   | 10.57 | 10.92 | 4.02  | 1.42  | 457              | 99.2               | 30.4              | 3.82             | 30.45        | 3.51              | 0.14         |

<sup>a</sup> The relative uncertainty of the obtained parameters is generally better than 1% for  $\epsilon_s$ , and 5% for  $\tau_j$ ,  $S_j$  and  $\epsilon_\infty$ . <sup>b</sup> Parameter not adjusted in the fit; <sup>c</sup>  $\alpha_3 = 0.002$ ; <sup>d</sup>  $\alpha_2 = 0.164$ .

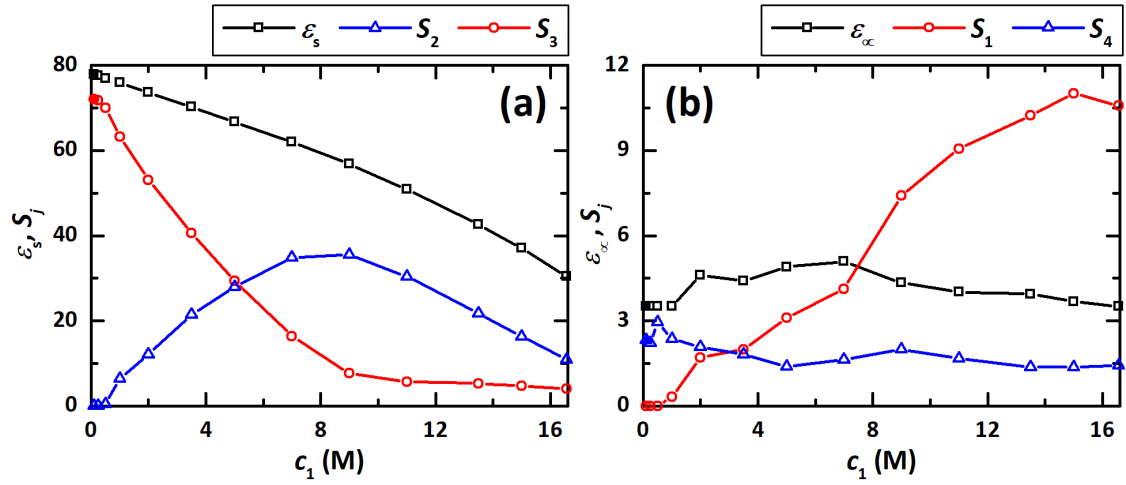

Figure S1: (a) Static permittivity,  $\epsilon_s$  (black squares), and amplitudes  $S_2$  (blue triangles) and  $S_3$  (red circles) of the best-fitting relaxation model (Table S2) describing the dielectric spectra of MEA/water mixtures at 298.15 K. (b) Corresponding amplitudes  $S_1$  (red circles) and  $S_4$  (black triangles) and high-frequency permittivity,  $\epsilon_\infty$  (black squares). Filled symbols for  $\epsilon_s$ ,  $S_3$ ,  $S_4$  &  $\epsilon_\infty$  are data for neat water taken from Ref. [2].

## References

- [1] M. Máté-Divó, L. Barcza, Investigation on the oligomerization of aminoalcohols in aqueous solution, *Z. Phys. Chem.* 190 (1995) 223–230.
- [2] A. Eiberweiser, A. Nazet, G. Heftner, R. Buchner, Ion hydration and association in aqueous potassium phosphate solutions, *J. Phys. Chem. B* 119 (2015) 5270–5281.
